1 **Costimulation through TLR2 drives polyfunctional CD8<sup>+</sup> T cell**  
2 **responses**  
3  
4

5 *Short title: TLR-mediated costimulation promotes cytokine production*  
6

7 **Fiamma Salerno<sup>\*,†</sup>, Julian J. Freen-van Heeren<sup>\*,†</sup>, Aurelie Guislain<sup>\*</sup>, Benoit P.**  
8 **Nicolet<sup>\*</sup> and Monika C. Wolkers<sup>\*,‡</sup>**  
9

10 **Author Affiliations**

11 <sup>\*</sup>Department of Hematopoiesis, Sanquin Research-Amsterdam UMC Landsteiner  
12 Laboratory, Amsterdam, The Netherlands

13 <sup>†</sup>These authors contributed equally to this work  
14

15 **‡Correspondence to:** Monika Wolkers. Department of Hematopoiesis, Sanquin  
16 Research-Amsterdam UMC Landsteiner Laboratory, Plesmanlaan 125, 1066 CX  
17 Amsterdam, The Netherlands. email: m.wolkers@sanquin.nl. Tel: +31-20-5127003.  
18 FAX: +31-20-5123474  
19

This research was supported by Sanquin Blood Supply, the Landsteiner Foundation of Blood Transfusion Research, and by the Dutch Science Foundation (LSBR- Fellow 1373 and VIDI grant 917.14.214 to M.C.W.).

20 **Abstract**

21 Optimal T cell activation requires antigen recognition through the T cell receptor (TCR),  
22 engagement of costimulatory molecules, and cytokines. T cells can also directly  
23 recognize danger signals through the expression of toll-like receptors (TLRs). Whether  
24 TLR ligands have the capacity to provide costimulatory signals and enhance antigen-  
25 driven T cell activation is not well understood. Here, we show that TLR2 and TLR7  
26 ligands potently lower the antigen threshold for cytokine production in T cells. To  
27 investigate how TLR triggering supports cytokine production, we adapted the protocol  
28 for flow cytometry-based fluorescence *in situ* hybridization (Flow-FISH) to mouse T  
29 cells. The simultaneous detection of cytokine mRNA and protein with single-cell  
30 resolution revealed that TLR triggering primarily drives *de novo* mRNA transcription.  
31 *Ifng* mRNA stabilization only occurs when the TCR is engaged. TLR2, but not TLR7-  
32 mediated costimulation, can enhance mRNA stability at low antigen levels. Importantly,  
33 TLR2 costimulation increases the percentage of polyfunctional T cells, a hallmark of  
34 potent T cell responses. In conclusion, TLR-mediated costimulation effectively  
35 potentiates T cell effector function to suboptimal antigen levels.

## 36 **Introduction**

37 CD8<sup>+</sup> T cell responses are critical to defend our body from insults. They promote the  
38 clearance of primary infections, protect us from previously encountered pathogens, and  
39 can control and kill tumor cells. To exert their effector function, T cells produce high  
40 levels of effector molecules, such as the key pro-inflammatory cytokines interferon- $\gamma$   
41 (IFN- $\gamma$ ), tumor necrosis factor- $\alpha$  (TNF- $\alpha$ ) and interleukin-2 (IL-2). T cells that produce  
42 two or more cytokines, also known as ‘polyfunctional’ T cells, identify the most potent  
43 effector T cells against infections and malignant cells (1-3). The induction of  
44 polyfunctional T cell responses thus remains the ultimate goal of vaccine and T cell  
45 therapy.

46

47 T cell effector function as defined by the magnitude of cytokine production depends on  
48 three signals: 1) triggering of the T cell receptor (TCR), 2) engagement of costimulatory  
49 molecules, and 3) availability of pro-inflammatory cytokines (4-6). All three signals are  
50 required for optimal priming of naive T cells (7, 8). In addition, the coordinated  
51 engagement of two or more signals can potentiate the activity of effector and memory T  
52 cells (9-11). The intensity of TCR signaling can vary depending on the amount and  
53 affinity of the antigen (12-14) and, upon suboptimal TCR engagement, triggering of  
54 costimulatory molecules, such as CD28, significantly decreases the threshold of T cell  
55 activation (15-19). In addition, cytokines like type I IFNs, IL-12 and IL-18 can promote  
56 IFN- $\gamma$  production both on their own, and in combination with TCR engagement (20-23).

57

58 During infection, T cells are also exposed to danger signals, which can be sensed by  
59 pattern recognition receptors, such as Toll-like receptors (TLRs). RNA-seq analysis  
60 revealed that long-lived human memory T cells express a strong TLR-signature, which is  
61 absent in naive T cells (24). In addition, TLR2 expression on human T cells was  
62 significantly increased upon TCR activation (24, 25), and TLR2 engagement was  
63 suggested to reduce the minimal TCR threshold required for T cell proliferation and  
64 memory formation (26). The acquired expression of TLRs on T cells suggests that TLRs  
65 may support the effector function of differentiated T cells. Indeed, we and others showed  
66 that effector and memory CD8<sup>+</sup> T cells - but not naive T cells - can directly respond to  
67 TLR2 and TLR7 ligands by producing IFN- $\gamma$  in an antigen-independent manner (27, 28).

68

69 At the molecular level, TLR-triggering alone on T cells specifically drives *de novo*  
70 transcription of short-lived *Ifng* mRNA, which promotes a short induction of cytokine  
71 production (27). Conversely, the engagement of the TCR also engages post-  
72 transcriptional mechanisms that increase the stability of cytokine mRNA and/or drives  
73 their translation (27, 29). These post-transcriptional regulatory events are required to  
74 reach optimal magnitude and kinetics of cytokine production (29), and can be potentiated  
75 by costimulatory signals, such as engagement of CD28 or LFA-1 (30, 31). Whether TLR  
76 ligands can also augment cytokine production of TCR triggered effector CD8<sup>+</sup> T cells  
77 and, if so, which mechanisms they employ is yet to be determined.

78

79 Here, we show that TLR2 and TLR7 ligands lower the antigen threshold required for  
80 cytokine production of effector CD8<sup>+</sup> T cells, yet by employing different mechanisms of



81 regulation. Whereas costimulation through TLR7 only induces *de novo* mRNA  
82 transcription, TLR2 signaling synergizes with the TCR to also prolong the half-life of  
83 *Ifn $\gamma$*  mRNA. The engagement of mRNA stabilization supported by TLR2 ligands  
84 correlates with enhanced polyfunctional capacity of T cells. Thus, our data demonstrate  
85 that distinct stimuli can differently integrate with the TCR signaling to fine-tune T cell  
86 responses. Unravelling the direct contribution of TLR triggering to T cell effector  
87 functions might be exploited in the future to rationalize the use of TLR ligands as  
88 adjuvants for vaccination strategies and T cell therapies.

## 89 **Materials and Methods**

### 90 **Mice, human PBMCs and cell culture**

91 Specific pathogen free C57BL/6J mice and C57BL/6J.OT-I TCR transgenic mice (OT-I)  
92 were housed and bred in filter top cages in the animal department of the Netherlands  
93 Cancer Institute (NKI). Animals used in experiments were 8-12 weeks of age.  
94 Experiments were approved by the Experimental Animal Committee (DEC) and  
95 performed in accordance with institutional, national and European guidelines. Studies  
96 with human T cells were performed in accordance with the Declaration of Helsinki  
97 (Seventh Revision, 2013). Buffy coats were obtained from healthy donors with written  
98 informed consent (Sanquin).

99 Murine and human T cells, MEC.B7.SigOVA cells, B16-F10 melanoma cells expressing  
100 the C-terminal part of ovalbumin (B16-OVA; (32)) and parental B16-F10 melanoma cells  
101 were cultured in IMDM (GIBCO-BRL) supplemented with 8% FCS, 2mM L-Glutamine,  
102 20U/mL penicillin G sodium salts, and 20µg/mL streptomycin sulfate. Medium for  
103 mouse-derived cells was supplemented with 15µM 2-mercaptoethanol.

104 Bone marrow (BM) derived macrophages from C57BL/6J mice were generated as  
105 previously described (27) and cultured in RPMI 1640 (GE Healthcare) supplemented as  
106 above plus 15% L-929 conditioned medium containing recombinant M-CSF.

107

### 108 **T cell isolation and activation**

109 Murine CD8<sup>+</sup> T cells were purified from C57BL/6J or C57BL/6J.OT-I splenocytes by  
110 negative MACS-selection according to manufacturer's protocol (Miltenyi CD8 isolation

111 kit; 90-99% purity) or by FACS-sorting (BD FACSAria III Cell Sorter; > 99.9% purity;  
112 Suppl Fig 1A).

113 For the generation of antigen-experienced T cells,  $1 \times 10^6$  MACS-purified CD8<sup>+</sup> OT-I T  
114 cells were activated for 20h MEC.B7.SigOVA cells as previously described (27).  
115 Activated T cells were harvested, washed, and put to rest for 3-15 days in the presence of  
116 10ng/mL recombinant murine IL-7 (rmIL-7; PeproTech). Resting OT-I T cells were  
117 stimulated in serum-free IMDM for indicated time points with 0.1nM to 100nM OVA<sub>257-</sub>  
118 <sub>264</sub> peptide (GenScript), 5 $\mu$ g/mL Pam<sub>3</sub>CysSK<sub>4</sub> (Pam3), 10 $\mu$ g/mL R848 (both InvivoGen),  
119 100 $\mu$ g/mL Zymosan (Sigma Aldrich, kind gift from M. Nolte), 1ng/mL recombinant  
120 murine IL-12 (PeproTech), or a combination thereof. As a control, BM-derived  
121 macrophages (BMM) were stimulated in serum-free IMDM for indicated time points  
122 with 5 $\mu$ g/mL Pam3, 100 $\mu$ g/mL Zymosan or 2 $\mu$ g/mL lipopolysaccharide (LPS,  
123 InvivoGen).

124 For *ex vivo* experiments, C57BL/6J CD8 $\alpha\beta$ <sup>+</sup> T cells were stimulated for 6 hours with  
125 2 $\mu$ g/mL plate bound anti-CD3 alone, (17.A2, Bioceros), or in combination with 1 $\mu$ g/mL  
126 soluble anti-CD28 (PV-1, Bioceros), 5 $\mu$ g/mL TLR2 ligand, 10 $\mu$ g/mL TLR7 ligand R848,  
127 or a combination thereof.

128 For studies with human T cells, peripheral blood mononuclear cells (PBMCs) were  
129 isolated by Lymphoprep density gradient separation (Stemcell Technologies). CD8<sup>+</sup> T  
130 cells were then purified from PBMCs by MACS-selection according to manufacturer's  
131 protocol (Miltenyi CD8 isolation kit). CD8<sup>+</sup> T cells were stimulated in serum-free IMDM  
132 for 6 hours with 1 $\mu$ g/mL plate-bound anti-CD3 alone (Hit3a, eBioscience), or in

133 combination with 1µg/mL soluble anti-CD28 (CD28.2, eBioscience), 0.1µg/mL Pam3 or  
134 10µg/mL R848.

135

### 136 **B16 melanoma-T cell co-culture**

137 B16-F10 melanoma cells were loaded with indicated amounts of OVA<sub>257-264</sub> peptide as  
138 previously described (29). OT-I T cells were added to pre-seeded tumor cells for 5h at a  
139 6:1 effector:target ratio. When indicated, 0.1, 1 or 5µg/mL Pam3 or 0.1, 1 or 10µg/mL  
140 R848 was added at t=0h to the cultures.

141

### 142 **Flow cytometry and intracellular cytokine staining**

143 For flow cytometry analysis and sorting, cells were washed with FACS buffer  
144 (phosphate-buffered saline [PBS], containing 1% FCS and 2mM EDTA) and labeled with  
145 monoclonal antibodies anti-CD8α (53-6.7), anti-CD8β (H35-17.2), anti-CD4 (clone  
146 GK1.5), anti-CD44 (IM-7), anti-L-selectin (CD62L) (MEL-14), anti-CD11b (M1/70),  
147 anti-CD11c (N418), anti-F4/80 (BM8), anti-PD-L1 (clone MIH5), anti-IFN-γ (XMG1.2),  
148 anti-TNF-α (MP6-XT22), and anti-IL2 (JES6-5H4) (all from eBioscience) for murine  
149 cells, or anti-CD8 (SK1), anti-TNF-α (Mab11) (both BD Biosciences), anti-IFN-γ  
150 (4.SB3), and anti-IL-2 (MQ1-17H12) (both Biolegend) for human T cells. Near-IR (Life  
151 Technologies) was used to exclude dead cells from analysis. For intracellular cytokine  
152 staining, cells were cultured in the presence of 1µg/ml brefeldin A (BD Biosciences) as  
153 indicated. For detection of degranulation, anti-CD107a (eBio1D43) was added at t=0h to  
154 the culture. Upon stimulation, cells were fixed and permeabilized with the  
155 Cytotfix/Cytoperm kit according to the manufacturer's protocol (BD Biosciences). The

156 frequency of IFN- $\gamma$ , TNF- $\alpha$  and IL-2 producing cells was calculated as percentage of  
157 Near-IR<sup>neg</sup> CD8 $\alpha$ <sup>+</sup> OT-I T cells, Near-IR<sup>neg</sup> CD8 $\alpha$  $\beta$ <sup>+</sup> murine T cells or Near-IR<sup>neg</sup> CD8<sup>+</sup>  
158 human T cells, unless otherwise specified. PD-L1 expression was evaluated on NearIR<sup>neg</sup>  
159 CD4<sup>+</sup> CD8 $\alpha$ <sup>-</sup> B16-OVA cells. Expression levels were acquired using FACS LSR Fortessa  
160 or FACSymphony (BD Biosciences) and data were analyzed using FlowJo software  
161 (Tree Star, version 10).

162

### 163 **Single molecule FISH probes**

164 Single-molecule FISH probes of 20 nucleotides for *Ifng*, *Tnfa*, and *Il2* mRNA were  
165 designed according to the manufacturer's guidelines (LGC Biosearch Technologies).  
166 Probes with predicted high affinity for secondary target genes (identified by BLASTN)  
167 were discarded when the murine gene skyline of the Immunological Genome Project  
168 (<http://www.immgen.org>) indicated gene expression in T cells. This resulted in 33 probes  
169 for *Ifng*, 45 probes for *Tnfa*, and 29 probes for *Il2*. Probes were Quasar 670-labeled.  
170 Sequences are available upon request. Binding competition assays were performed with  
171 identical unlabeled probe sets (Sigma-Aldrich). Quasar 670-labeled probes for human  
172 *PHOX2B* were used as control probes.

173

### 174 **Flow-FISH**

175 The Flow-FISH protocol was adapted from (33). Briefly, T cells were activated with  
176 indicated stimuli in the presence of 2 $\mu$ M monensin (eBioscience). Cells were stained for  
177 extracellular markers, fixed, permeabilized and intracellular cytokine staining was  
178 performed with the Cytotfix/Cytoperm kit according to the manufacturer's protocol (BD

179 Biosciences) in 96-well V-bottom plates as previously described. All buffers, antibodies  
180 and reagents were freshly supplemented with 4 units recombinant murine RNase A/B/C  
181 inhibitor/ml prior to use (New England BioLabs). Cells were washed twice with 200µl  
182 wash buffer (RNase free water containing 12.5% formamide (Sigma Aldrich), 2X SSC,  
183 and 4 units RNase inhibitor/ml) and transferred to 1.5 ml LoBind Eppendorf tubes  
184 (Eppendorf). Cells were incubated for 16h at 37°C + 5% CO<sub>2</sub> with 15nM FISH probes in  
185 50µl hybridization buffer (RNase free water containing 10% formamide, 1X SSC, 0.1  
186 g/ml dextran sulfate salts (Sigma Aldrich) and 40 units RNase inhibitor/ml). Cells were  
187 washed once with 1 ml wash buffer prior to acquisition in wash buffer by flow cytometry.  
188

### 189 **Quantitative PCR analysis**

190 Total RNA was extracted using Trizol reagent (Invitrogen). cDNA was synthesized using  
191 SuperScript III Reverse Transcriptase (Invitrogen) and quantitative Real-Time PCR was  
192 performed with SYBR green and a StepOne Plus RT-PCR system (both Applied  
193 Biosystems). Reactions were performed in duplicate or triplicate, and C<sub>t</sub> values were  
194 normalized to L32 levels. Primer sequences were previously described (27).

195 To determine the half-life of cytokine mRNA, T cells were activated for 3h with  
196 indicated stimuli, and subsequently treated with 10µg/ml Actinomycin D (Sigma-  
197 Aldrich) for indicated time points.

198

### 199 **RNA-sequencing analysis**

200 RNA-seq data of B16-F10 cells left untreated or treated with IFN-γ, and of blood-derived  
201 monocytes were retrieved from the Sequence Repository Archive (SRA,

202 <https://www.ncbi.nlm.nih.gov/sra>) (respectively: Geo: GSE106390, (34) and samples:  
203 SRR5483450, SRR5483451, SRR5483452 from Geo: GSE86573, (35)). Fastq files were  
204 obtained with fastq-dump (SRA toolkit version 2.5). Reads were mapped and transcripts  
205 per million (TPM) were obtained with Salmon ((36), version 0.10.2). TPM values of  
206 TLRs were combined into one count table using basic R (version 3.5.1) functions in R-  
207 studio (version 1.1.453), and plotted using GraphPad PRISM (version 7).

208

### 209 **Statistical analysis**

210 Results are expressed as mean  $\pm$  SD. Statistical analysis between groups was performed  
211 with GraphPad Prism 7, using paired or unpaired 2-tailed Student *t* test when comparing  
212 2 groups, or 1-way or 2-way ANOVA test with Dunnett's or Tukey's multiple  
213 comparison when comparing  $> 2$  groups. *P* values  $< 0.05$  were considered statistically  
214 significant.

215 **Results**

216 **TLR2-mediated costimulation lowers the antigen threshold for cytokine production**  
217 **of CD8<sup>+</sup> T cells**

218 We previously showed that TLR2 ligands can promote antigen-independent production of  
219 IFN- $\gamma$  in CD8<sup>+</sup> T cells (27). To determine whether TLR2 can also provide costimulatory  
220 signals, we isolated and purified spleen-derived CD8<sup>+</sup> T cells from C57BL/6J mice,  
221 which were activated for 6h with  $\alpha$ CD3 alone, or in combination with the TLR2 ligand  
222 Pam<sub>3</sub>CysSK<sub>4</sub> (Pam3). We measured the production of the three key cytokines that define  
223 effective T cell responses, i.e. IFN- $\gamma$ , TNF- $\alpha$ , and IL-2 (37-39).

224

225 The TLR2 ligand Pam3 potently increased the percentage of IFN- $\gamma$  producing T cells  
226 compared to  $\alpha$ CD3 stimulation alone. In fact, Pam3 costimulation resulted in levels of  
227 cytokine production similar to levels reached with  $\alpha$ CD28 costimulation (Fig 1A).  
228 Combining Pam3 and  $\alpha$ CD28 induced even higher levels of cytokine production,  
229 indicating that these two triggers acted synergistically (Fig 1A). Importantly, Pam3  
230 costimulation was effective in MACS-purified (>90% purity) and in FACS-sorted  
231 (>99.9% purity) CD8<sup>+</sup> T cells (Suppl Fig 1A-C), again demonstrating that the TLR2  
232 ligand acted directly on the T cells (27). Whereas T cells triggered with Pam3 alone only  
233 produce IFN- $\gamma$  (27), in combination with  $\alpha$ CD3, or  $\alpha$ CD3/ $\alpha$ CD28 stimulation Pam3  
234 activation also induced the production of TNF- $\alpha$  and IL-2 in a subset of responding T  
235 cells (Fig 1A, Suppl Fig 1B, C). In line with the expression pattern of TLR2 (25, 27),



236 Pam3 increased the cytokine production specifically in memory-like CD44<sup>hi</sup> T cells, and  
237 not of CD44<sup>low</sup> naive T cells (Suppl Fig 1B, C).

238

239 To determine the effect of TLR2-mediated costimulation in combination with antigen-  
240 specific activation, we turned to TCR transgenic OT-I T cells that were *in vitro* activated  
241 and rested for 3-15 days in the absence of antigen, as previously described (27). CD8<sup>+</sup> T  
242 cell purity in this culture system reaches >99.9% at day 3 of culture ((27); data not  
243 shown). We stimulated T cells with soluble OVA<sub>257-264</sub> peptide, allowing for peptide  
244 loading of T cells and immediate presentation to the neighbouring cells, without the need  
245 to add antigen-presenting cells. This experimental setup enabled us to specifically analyse  
246 the direct effect of TLR ligands on T cells. Pam3 costimulation significantly increased  
247 the cytokine production of OT-I T cells activated with 100nM OVA<sub>257-264</sub> peptide  
248 (aa:SIINFEKL; N4; Fig 1B). Interestingly, T cells activated with the low affinity variant  
249 (aa:SIITFEKL; T4) in combination with Pam3 produced comparable levels of cytokines  
250 as when T cells were activated with the high affinity N4 peptide alone (Fig 1B). In line  
251 with these results, when Pam3 was added to T cells activated with a low peptide  
252 concentration (0.1nM; OVA<sub>low</sub>), IFN- $\gamma$  and TNF- $\alpha$  production raised from hardly  
253 detectable to significant levels (Fig 1C). In addition, Pam3 substantially boosted the  
254 protein production of all three measured cytokines in response to intermediate peptide  
255 concentrations (1nM; OVA<sub>int</sub>; Fig 1C and data not shown). Thus, TLR2-mediated  
256 costimulation with Pam3 lowers the antigen threshold required for T cell activation.

257

258 TLR2 dimerizes with TLR1 or with TLR6 (40). To determine whether both two  
259 heterodimers induce costimulatory signals to T cells, we activated T cells with OVA<sub>int</sub> in  
260 combination with either Pam3, which activates TLR1/2 heterodimers (41), or zymosan,  
261 which activates TLR2/6 heterodimers (42). In contrast to the costimulation induced by  
262 Pam3, stimulation with zymosan alone or in combination with OVA<sub>int</sub> did not result in  
263 increased cytokine production (Suppl Fig 2A, B). Nevertheless, zymosan induced TNF- $\alpha$   
264 production of BM-derived macrophages (BMM) (Suppl Fig 2A), demonstrating its  
265 biologic activity. Our data thus demonstrate that TLR2 provides costimulation to T cells  
266 only when paired with TLR1, and not with TLR6.

267

268 Human T cells also express TLR2, which is upregulated upon TCR triggering (25). To  
269 determine whether the costimulatory capacity of TLR2 ligands was conserved between  
270 mice and men, we purified CD8<sup>+</sup> T cells from human PBMCs and stimulated them for 6h  
271 with  $\alpha$ CD3 alone, or in combination with TLR2 ligand Pam3. Pam3 potently increased  
272 the percentage of IFN- $\gamma$ -producing human CD8<sup>+</sup> T cells to levels of cytokine production  
273 that were comparable to CD28-mediated costimulation (Fig 1D). Interestingly, TNF- $\alpha$   
274 and IL-2 production were not impacted upon Pam3 costimulation (Suppl Fig 1E).  
275 Altogether, our findings demonstrate that the TLR2 ligand Pam3 provides costimulatory  
276 signals to both murine and human T cells.

277

### 278 **Simultaneous analysis of cytokine mRNA and protein production of murine T cells**

279 We next questioned which signals drive the cytokine production of T cells. At the  
280 molecular level, the integration of transcriptional and post-transcriptional regulatory

281 events is required to coordinate the production of cytokines (29, 43-47). To dissect the  
282 link between distinct T cell signals and regulation of cytokine production, the analysis of  
283 both mRNA and protein levels is thus warranted. Because CD8<sup>+</sup> T cells respond  
284 heterogeneously to activation (3, 29, 33), the analysis of bulk populations can mask  
285 differences to various stimuli. This may be of particular importance when measuring the  
286 effect of costimulatory signals. We therefore reasoned that measuring mRNA and protein  
287 on a single cell level would help to better define T cell responses (33, 48).

288

289 We recently established a multi-color flow-cytometry-based fluorescence *in situ*  
290 hybridization (Flow-FISH) protocol for human T cells that allowed us to simultaneously  
291 detect cytokine mRNA and protein with a single-cell resolution (33). Here, we optimized  
292 Flow-FISH for mouse T cells (Fig 2A). Upon T cell activation with 100nM OVA  
293 (OVA<sub>hi</sub>), all three cytokine mRNAs and corresponding proteins were detectable (Fig 2A).  
294 By making use of an unrelated FISH probe set directed against human *PHOX2B* mRNA  
295 we verified the specificity of the staining upon T cell activation (control; Fig 2A).  
296 Furthermore, when we spiked in increasing amounts of unlabeled cytokine probes to  
297 activated T cells, the mRNA signal decreased in a concentration-dependent manner  
298 (Suppl Fig 3A).

299

300 We next determined the sensitivity of Flow-FISH. To this end, we turned to our previous  
301 findings that cytokine mRNA levels do not always correlate with the actual protein  
302 output (29). The production of TNF- $\alpha$  predominately depends on translation of pre-  
303 formed mRNA, and only high antigen levels promote *de novo* mRNA transcription. In

304 contrast, the production of IL-2 depends entirely on *de novo* transcription, whereas IFN- $\gamma$   
305 production depends both on *de novo* transcription and on translation of pre-formed  
306 mRNA (29). To determine the capacity of Flow-FISH to detect these differences, we  
307 activated T cells with different amounts of antigen and followed their responsiveness  
308 over time. As expected, the overall percentage of mRNA<sup>+</sup> and protein<sup>+</sup> T cells with Flow-  
309 FISH was highest when T cells were stimulated with OVA<sub>hi</sub> (Fig 2B). Yet, Flow-FISH  
310 revealed a cytokine-specific ratio between mRNA<sup>+</sup> and protein<sup>+</sup> T cells (Fig 2C). The  
311 percentage and the mean fluorescence intensity (MFI) of *Tnfa* mRNA<sup>+</sup> cells was  
312 comparable whether T cells were stimulated with OVA<sub>int</sub>, or with OVA<sub>hi</sub> (Fig 2B, C;  
313 Suppl Fig 3B). Furthermore, we previously showed that the production of TNF- $\alpha$  protein  
314 is driven by increasing translation efficiency, and not by changes in its transcriptional rate  
315 (29). This was also reflected by the low levels of *Tnfa* mRNA detected by Flow-FISH  
316 (Fig 2B, C). In contrast, irrespective of the antigen load, *Il2* mRNA levels always  
317 matched with the corresponding protein levels (Fig 2B, C; Suppl Fig 3B). For IFN- $\gamma$ , the  
318 kinetics of mRNA and protein overlapped when T cells were stimulated with OVA<sub>int</sub>,  
319 whereas activation with OVA<sub>hi</sub> resulted in higher levels of protein<sup>+</sup> than of mRNA<sup>+</sup> cells  
320 (Fig 2C). These findings show that Flow-FISH is an effective method to visualize the  
321 relation of cytokine mRNA and protein on a single cell level.

322

### 323 **TLR2 triggering boosts *Ifng* mRNA transcription**

324 Cytokines follow individual production kinetics upon T cell activation with antigen (3,  
325 29, 33). To determine if costimulation through TLR2 triggering altered the magnitude  
326 and/or the kinetics of cytokine production, we measured IFN- $\gamma$ , TNF- $\alpha$  and IL-2 protein

327 by intracellular cytokine staining. To follow cytokine production over time, we only  
328 blocked protein secretion with brefeldin A for the last 2h of stimulation. Pam3  
329 significantly enhanced the percentage of IFN- $\gamma$ , TNF- $\alpha$  and IL-2 producing T cells upon  
330 OVA<sub>int</sub> stimulation, with the most prominent effect on IFN- $\gamma$  (Fig 3A). Pam3 mediated  
331 costimulation did not affect the kinetics of TNF- $\alpha$  and IL-2 production. Interestingly, the  
332 percentage of IFN- $\gamma$ <sup>+</sup> T cells after 4h of OVA<sub>int</sub> stimulation together with Pam3 reached  
333 similar percentages as when activated with OVA<sub>hi</sub> (Fig 3A), but with a significant delay  
334 of the onset of production at 2h (OVA<sub>int</sub>+Pam3= 7 $\pm$ 2% IFN- $\gamma$ <sup>+</sup> T cells, compared to  
335 OVA<sub>hi</sub>= 30 $\pm$ 8% IFN- $\gamma$ <sup>+</sup> T cells). Thus, Pam3 primarily boosts the production of IFN- $\gamma$ ,  
336 albeit with a delay in the response kinetics.

337

338 We previously found that the TLR2-mediated innate IFN- $\gamma$  production depends on *de*  
339 *novo* mRNA transcription (27). To determine if similar mechanisms apply for Pam3-  
340 mediated costimulation we first measured the cytokine mRNA levels with Flow-FISH.  
341 The *Ifng* mRNA levels were not significantly higher in T cells activated for 2h with  
342 OVA<sub>int</sub> with or without Pam3 costimulation (Fig 3B, C). At 4h and 6h of activation,  
343 however, the addition of Pam3 significantly boosted the *Ifng* mRNA levels to a similar  
344 magnitude as upon stimulation with OVA<sub>hi</sub> (Fig 3B, C). This was detectable in terms of  
345 both the percentage of *Ifng* mRNA<sup>+</sup> cells and the amount of *Ifng* mRNA produced per  
346 cell, as measured by *Ifng* MFI (Fig 3C). Flow-FISH thus showed that TLR-2-mediated  
347 costimulation enhances cytokine production by maintaining high mRNA levels.

348

349 **TLR2 triggering amplifies the TCR signals to enhance *Ifng* mRNA stability**

350 The magnitude and the duration of IFN- $\gamma$  production depends on the capacity to stabilize  
351 *Ifng* mRNA (29). We determined the mRNA half-life by measuring the *Ifng* mRNA  
352 decay from 3h of activation onwards, with RNA polymerase II transcription inhibitor  
353 Actinomycin D (ActD) by RT-PCR. Indeed, increased antigen load stabilizes the *Ifng*  
354 mRNA (Fig 4A). In line with the limited cytokine production (Fig 1C), activation with  
355 OVA<sub>low</sub> displayed an equally short *Ifng* half-life as unstimulated T cells ( $t_{1/2} = \sim 30$  min;  
356 Fig 4A; (27)). Stimulation with OVA<sub>int</sub> and OVA<sub>hi</sub>, however, significantly prolonged the  
357 half-life of *Ifng* in a dose-dependent manner (OVA<sub>int</sub>:  $t_{1/2} = \sim 90$  min, OVA<sub>hi</sub>:  $t_{1/2} > 2$ h;  
358 Fig 4A).

359

360 It was previously shown that costimulation through CD28 and LFA-1 stabilizes cytokine  
361 mRNA (30, 31). Stabilization of *Ifng* mRNA was also observed upon Pam3  
362 costimulation. T cell activation with OVA<sub>low</sub> plus Pam3 increased *Ifng* mRNA half-life to  
363 levels similar to OVA<sub>int</sub> stimulation ( $t_{1/2} = \sim 90$  min, compare Fig 4A with Fig 4B, left  
364 panel). Similarly, OVA<sub>int</sub> plus Pam3 significantly enhanced *Ifng* mRNA stability ( $t_{1/2} >$   
365 2h, Fig 4B, right panel).

366

367 Because T cell activation with Pam3 alone did not stabilize the *Ifng* mRNA (27), we  
368 hypothesized that costimulation itself may not be the determinant factor inducing mRNA  
369 stabilization. Rather, we postulated that TCR signaling is required for mRNA stability,  
370 and that costimulation can potentiate this process. To study this hypothesis, we activated  
371 T cells in a fully antigen-independent manner. When Pam3 stimulation was combined  
372 with IL-12, we measured IFN- $\gamma$  protein levels that were similar to activation with OVA<sub>int</sub>

373 (Fig 4C, D left panel). Interestingly, at 2h of stimulation Pam3 plus IL-12 induced higher  
374 *Ifng* mRNA levels than stimulation with OVA<sub>int</sub> (Fig 4D right panel). The accumulation  
375 of *Ifng* mRNA, however, could not be attributed to stabilization of mRNA (Fig 4E). In  
376 conclusion, TLR2 triggering only stabilizes *Ifng* mRNA in the presence of TCR  
377 engagement.

378

### 379 **TLR7-mediated costimulation supports the production of IFN- $\gamma$ without mRNA** 380 **stabilization**

381 Not only TLR2 triggering, but also TLR7 triggering induces IFN- $\gamma$  production by T cells  
382 in an antigen-independent manner (27). To determine if TLR7 ligands also provide  
383 costimulatory signals, we stimulated OT-I T cells with OVA<sub>low</sub> or OVA<sub>int</sub> in combination  
384 with the TLR7 ligand R848. As TLR2 engagement alike, TLR7 triggering lowered the  
385 antigen threshold of T cell activation and significantly increased the production of IFN- $\gamma$   
386 (Fig 5A). Similar results were found for *ex vivo* FACS-sorted memory-like CD44<sup>hi</sup> CD8<sup>+</sup>  
387 T cells activated with  $\alpha$ CD3 and/or  $\alpha$ CD28 and R848 (Suppl Fig 1D). However, in  
388 contrast to Pam3, this effect appears to be species-specific, because R848 does not  
389 enhance the cytokine production of human CD8<sup>+</sup> T cells (Suppl Fig 1E).

390 When turning back to our mouse system, we observed that R848 also supported IL-12-  
391 mediated innate production of IFN- $\gamma$  (Fig 5A, B). The increase in IFN- $\gamma$  protein<sup>+</sup> T cells  
392 directly correlated with increased *Ifng* mRNA levels (Fig 5B). *Ifng* mRNA consistently  
393 displayed a short half-life when T cells were stimulated in an antigen-independent  
394 manner (compare Fig 4E and Fig 5C), resulting in similar levels of protein production  
395 when Pam3 or R848 were used in combination with IL-12 (Fig 5D). Interestingly, TLR7-

396 mediated costimulation completely failed to prolong *Ifng* mRNA half-life when engaged  
397 in combination with the TCR (Fig 5C), and led to lower levels of protein production than  
398 TLR2-mediated costimulation (Fig 5D). Altogether, our data show that the benefit of  
399 mRNA stabilization requires TCR signaling, can be prolonged by TLR2 ligands and  
400 significantly potentiates cytokine production.

401

402 **TLR2-mediated costimulation supports polyfunctional CD8<sup>+</sup> T cell responses**  
403 **against tumor cells**

404 TLR ligands are often used as adjuvants for immunotherapy to boost innate immune  
405 responses and enhance antigen presentation (49-56). We here investigated whether TLR  
406 ligands can also directly augment the cytokine profile of T cell responses against tumor  
407 cells. We loaded B16-F10 melanoma cells with increasing amounts of OVA<sub>257-264</sub>  
408 peptide, and measured the production of IFN- $\gamma$ , TNF- $\alpha$  and IL-2 by OT-I T cells after 5h  
409 of co-culture with the tumor cells, in the presence or absence of Pam3 or R848. Of note,  
410 B16-F10 melanoma cells do not express TLR1, TLR2, TLR6 or TLR7 at detectable  
411 levels when compared to blood monocytes (Suppl Fig 4A). We could therefore directly  
412 determine the direct effect of TLR ligands on T cell effector function against tumor cells.  
413 Whereas TLR costimulation increased the percentage of TNF- $\alpha$ <sup>+</sup> and IL-2<sup>+</sup> T cells only at  
414 high antigen levels, the production of IFN- $\gamma$  was also supported at low amounts of  
415 antigen (Fig 6A, Suppl Fig 4B). Furthermore, the effects of TLR-mediated costimulation  
416 were dose-dependent. Increasing concentrations of TLR ligands potentiated the overall  
417 percentage of cytokine-producing T cells in response to B16-OVA cells that  
418 constitutively expressed the C-terminal part of ovalbumin (32) (Fig 6B). Interestingly, the



419 expression of the degranulation marker CD107a did not change upon TLR-mediated  
420 costimulation (Suppl Fig 4C), indicating that TLR signaling specifically promoted  
421 cytokine production.

422

423 Potent effector T cells produce two or more cytokines (1-3). This polyfunctional profile  
424 correlates with a higher efficacy of vaccines and T cell therapies (38, 57). Intriguingly,  
425 even though Pam3 and R848 both supported the cytokine production of T cells in  
426 response to tumor cells, the polyfunctional profile of effector T cells was only enhanced  
427 by TLR2 ligand Pam3 (Fig 6C). Higher doses of R848 skewed the immune response  
428 towards single IFN- $\gamma$ -producing T cells (Fig 6C). In line with the absence of TLR  
429 expression (Suppl Fig 4A), TLR ligands alone did not affect cell viability of tumor cells,  
430 or T-cell mediated induction of PD-L1 and MHC-II expression (Suppl Fig 4D, E and data  
431 not shown).

432

433 In conclusion, TLR2 and TLR7 ligands provide costimulatory signals to CD8<sup>+</sup> T cells,  
434 but they do so through different mechanisms. Importantly, only TLR2 triggering  
435 promotes polyfunctional CD8<sup>+</sup> T cell responses.

## 436 **Discussion**

437 CD8<sup>+</sup> T cells receive different stimuli upon infection that shape their effector functions.  
438 This allows T cells to appropriately respond to specific pathogens. Here, we show that  
439 TLR2 and TLR7 provide costimulatory signals to amplify the magnitude of cytokine  
440 production in murine and in human CD8<sup>+</sup> T cells. TLR ligands lower the antigen  
441 threshold required for T cell activation independently of antigen avidity and/or affinity  
442 for the TCR. Whereas antigen-independent engagement of TLRs only induces the  
443 production of IFN- $\gamma$  (27), in combination with TCR triggering, TLR-mediated  
444 costimulation also supports the production of TNF- $\alpha$  and IL-2.

445

446 In agreement with our previous findings (27), TLR signaling significantly promotes the  
447 transcription of *Ifng* mRNA. This effect is further enhanced when TLR ligands synergize  
448 with suboptimal antigen levels or with antigen-independent stimuli, such as IL-12. The  
449 exact mode of action of TLR-mediated support of TCR and IL-12 signaling is not yet  
450 known, and several signal-transduction pathways can be involved. We and others  
451 previously showed that TLR2-dependent transcription of *Ifng* mRNA in T cells engages  
452 PI3K and Akt signaling (27, 58). In dendritic cells and macrophages, TLR2 and TLR7  
453 engagement also activates nuclear factor kappa B (NF- $\kappa$ B) (59, 60) and activator protein  
454 1 (AP-1) (61, 62), two crucial transcription factors for cytokine production (63, 64).  
455 Because PI3K/Akt, NF- $\kappa$ B and AP-1 are also activated through the TCR, we hypothesize  
456 that TLR-mediated costimulation can further amplify these pathways in T cells, and  
457 synergize with the TCR-dependent transcription factor NFAT to maximize *Ifng* mRNA  
458 transcription (63). Interestingly, NF- $\kappa$ B and AP-1 can also be activated downstream of

459 the IL-18 receptor and synergize with IL-12-mediated STAT4 activity to enhance  
460 antigen-independent *Ifn*g gene expression in T cells (65-67). It is therefore tempting to  
461 speculate that the engagement of NF- $\kappa$ B and AP-1 represents the main mode of action of  
462 TLR ligands to boost *Ifn*g mRNA transcription in T cells, irrespective from the presence  
463 of the antigen.

464

465 *De novo* transcription of cytokine mRNA is however not sufficient to optimally shape the  
466 magnitude and kinetics of cytokine production (29). mRNA turnover is another critical  
467 parameter (43-46), and the stability of *Ifn*g mRNA strongly depends on the quality and  
468 the quantity of stimuli that a T cell receives (27, 29). T cell activation through TLRs  
469 alone fails to stabilize *Ifn*g mRNA, thereby restricting the magnitude of innate-like  
470 cytokine production by T cells (27). Similarly, suboptimal antigen levels alone cannot  
471 promote the stabilization of *Ifn*g mRNA, but this can be induced with additional  
472 costimulatory signals. As for classical costimulatory molecules alike (30, 31), we show  
473 here that TLR2 signaling synergized with TCR signaling to stabilize *Ifn*g mRNA.  
474 Interestingly, TLR7 costimulation failed to stabilize *Ifn*g mRNA. The triggering of TLR2,  
475 but not TLR7, activates the mitogen-activated protein kinases (MAPK) cascade (60), and  
476 MAPK signaling can enhance cytokine mRNA stability (68, 69). Whether TLR2 ligands  
477 support TCR-mediated stabilization of cytokine mRNA through MAPK signaling  
478 remains to be determined. Regardless of the mechanism, costimulation through TLR2  
479 potentiates cytokine production in response to suboptimal antigen loads by enhancing  
480 TCR-mediated stabilization of *Ifn*g mRNA.

481

482 TLR ligands are currently used as adjuvants for vaccines and T cell therapies (49-52, 54-  
483 56). In addition to their well-known effect in boosting innate immune responses and  
484 enhancing antigen presentation, we reveal that TLR ligands can also directly augment T  
485 cell responses. We recently showed that tumor-infiltrating T cells lose their capacity to  
486 produce cytokines because they fail to stabilize the cytokine mRNA (70). It is therefore  
487 tempting to speculate that TLR2 could promote anti-tumoral T cell responses by  
488 providing costimulatory signals to T cells and prolonging cytokine mRNA half-life. This  
489 in turn can potentiate the response rate of other immune cell types, as shown for B cells  
490 and macrophages (27, 71). TLR ligands may also act on T cell subsets residing at barrier  
491 tissues, like tissue resident memory T cells. These cells are routinely exposed to danger  
492 signals and non-cognate pathogens, and may thus develop cell-specific regulatory  
493 mechanisms. In conclusion, dissecting how TLR signals integrate within T cells to  
494 promote optimal cytokine production may be crucial to rationalize the use of TLR ligands  
495 as adjuvants and improve the efficacy of vaccines and immunomodulatory therapies.

496 **Author Contributions**

497 F.S., J.J.F.H., and A.G. performed experiments, B.P. Nicolet provided technical help and  
498 performed RNAseq data analysis, and F.S., J.J.F.H., and M.C.W. designed experiments,  
499 analyzed data, and wrote the manuscript.

500

501 **Acknowledgements**

502 We would like to thank the animal caretakers from the NKI, B. Popovic for isolating  
503 murine bone marrow, and E. Mul for cell sorting.

504

505 **Disclosures**

506 The authors have no financial conflict of interest.

507 **References**

- 508 1. Almeida, J. R., D. A. Price, L. Papagno, Z. A. Arkoub, D. Sauce, E. Bornstein, T. E. Asher, A.  
509 Samri, A. Schnuriger, I. Theodorou, D. Costagliola, C. Rouzioux, H. Agut, A. G. Marcelin,  
510 D. Douek, B. Autran, and V. Appay. 2007. Superior control of HIV-1 replication by CD8+ T  
511 cells is reflected by their avidity, polyfunctionality, and clonal turnover. *J Exp Med* 204:  
512 2473-2485.
- 513 2. Ciuffreda, D., D. Comte, M. Cavassini, E. Giostra, L. Buhler, M. Perruchoud, M. H. Heim,  
514 M. Battegay, D. Genne, B. Mulhaupt, R. Malinverni, C. Oneta, E. Bernasconi, M. Monnat,  
515 A. Cerny, C. Chuard, J. Borovicka, G. Mentha, M. Pascual, J. J. Gonvers, G. Pantaleo, and  
516 V. Dutoit. 2008. Polyfunctional HCV-specific T-cell responses are associated with  
517 effective control of HCV replication. *Eur J Immunol* 38: 2665-2677.
- 518 3. Han, Q., N. Bagheri, E. M. Bradshaw, D. A. Hafler, D. A. Lauffenburger, and J. C. Love.  
519 2012. Polyfunctional responses by human T cells result from sequential release of  
520 cytokines. *Proc Natl Acad Sci U S A* 109: 1607-1612.
- 521 4. Acuto, O., and F. Michel. 2003. CD28-mediated co-stimulation: a quantitative support  
522 for TCR signalling. *Nat Rev Immunol* 3: 939-951.
- 523 5. Liu, Y., R. H. Wenger, M. Zhao, and P. J. Nielsen. 1997. Distinct costimulatory molecules  
524 are required for the induction of effector and memory cytotoxic T lymphocytes. *J Exp*  
525 *Med* 185: 251-262.
- 526 6. Haring, J. S., V. P. Badovinac, and J. T. Harty. 2006. Inflaming the CD8+ T cell response.  
527 *Immunity* 25: 19-29.
- 528 7. Curtsinger, J. M., D. C. Lins, and M. F. Mescher. 2003. Signal 3 determines tolerance  
529 versus full activation of naive CD8 T cells: dissociating proliferation and development of  
530 effector function. *J Exp Med* 197: 1141-1151.
- 531 8. Kapsenberg, M. L. 2003. Dendritic-cell control of pathogen-driven T-cell polarization.  
532 *Nat Rev Immunol* 3: 984-993.
- 533 9. Blachere, N. E., H. K. Morris, D. Braun, H. Saklani, J. P. Di Santo, R. B. Darnell, and M. L.  
534 Albert. 2006. IL-2 is required for the activation of memory CD8+ T cells via antigen cross-  
535 presentation. *J Immunol* 176: 7288-7300.
- 536 10. Frohlich, M., T. Gogishvili, D. Langenhorst, F. Luhder, and T. Hunig. 2016. Interrupting  
537 CD28 costimulation before antigen rechallenge affects CD8(+) T-cell expansion and  
538 effector functions during secondary response in mice. *Eur J Immunol* 46: 1644-1655.
- 539 11. Sagi, Y., A. Landrigan, R. Levy, and S. Levy. 2012. Complementary costimulation of  
540 human T-cell subpopulations by cluster of differentiation 28 (CD28) and CD81. *Proc Natl*  
541 *Acad Sci U S A* 109: 1613-1618.
- 542 12. Zehn, D., S. Y. Lee, and M. J. Bevan. 2009. Complete but curtailed T-cell response to very  
543 low-affinity antigen. *Nature* 458: 211-214.
- 544 13. Kundig, T. M., A. Shahinian, K. Kawai, H. W. Mittrucker, E. Sebzda, M. F. Bachmann, T.  
545 W. Mak, and P. S. Ohashi. 1996. Duration of TCR stimulation determines costimulatory  
546 requirement of T cells. *Immunity* 5: 41-52.
- 547 14. Corse, E., R. A. Gottschalk, and J. P. Allison. 2011. Strength of TCR-peptide/MHC  
548 interactions and in vivo T cell responses. *J Immunol* 186: 5039-5045.
- 549 15. Dolfi, D. V., P. A. Duttagupta, A. C. Boesteanu, Y. M. Mueller, C. H. Ollai, A. B. Borowski,  
550 and P. D. Katsikis. 2011. Dendritic cells and CD28 costimulation are required to sustain  
551 virus-specific CD8+ T cell responses during the effector phase in vivo. *J Immunol* 186:  
552 4599-4608.

- 553 16. Grujic, M., C. Bartholdy, M. Remy, D. D. Pinschewer, J. P. Christensen, and A. R.  
554 Thomsen. 2010. The role of CD80/CD86 in generation and maintenance of functional  
555 virus-specific CD8+ T cells in mice infected with lymphocytic choriomeningitis virus. *J*  
556 *Immunol* 185: 1730-1743.
- 557 17. Edelman, K. H., and C. B. Wilson. 2001. Role of CD28/CD80-86 and CD40/CD154  
558 costimulatory interactions in host defense to primary herpes simplex virus infection. *J*  
559 *Viro* 75: 612-621.
- 560 18. Mittrucker, H. W., M. Kursar, A. Kohler, R. Hurwitz, and S. H. Kaufmann. 2001. Role of  
561 CD28 for the generation and expansion of antigen-specific CD8(+) T lymphocytes during  
562 infection with *Listeria monocytogenes*. *J Immunol* 167: 5620-5627.
- 563 19. Welten, S. P., A. Redeker, K. L. Franken, J. D. Oduro, F. Ossendorp, L. Cicin-Sain, C. J.  
564 Melief, P. Aichele, and R. Arens. 2015. The viral context instructs the redundancy of  
565 costimulatory pathways in driving CD8(+) T cell expansion. *Elife* 4.
- 566 20. Berg, R. E., E. Crossley, S. Murray, and J. Forman. 2003. Memory CD8+ T cells provide  
567 innate immune protection against *Listeria monocytogenes* in the absence of cognate  
568 antigen. *J Exp Med* 198: 1583-1593.
- 569 21. Berg, R. E., C. J. Cordes, and J. Forman. 2002. Contribution of CD8+ T cells to innate  
570 immunity: IFN-gamma secretion induced by IL-12 and IL-18. *Eur J Immunol* 32: 2807-  
571 2816.
- 572 22. Freeman, B. E., E. Hammarlund, H. P. Raue, and M. K. Slifka. 2012. Regulation of innate  
573 CD8+ T-cell activation mediated by cytokines. *Proc Natl Acad Sci U S A* 109: 9971-9976.
- 574 23. Kohlmeier, J. E., T. Cookenham, A. D. Roberts, S. C. Miller, and D. L. Woodland. 2010.  
575 Type I interferons regulate cytolytic activity of memory CD8(+) T cells in the lung airways  
576 during respiratory virus challenge. *Immunity* 33: 96-105.
- 577 24. Akondy, R. S., M. Fitch, S. Edupuganti, S. Yang, H. T. Kissick, K. W. Li, B. A. Youngblood, H.  
578 A. Abdelsamed, D. J. McGuire, K. W. Cohen, G. Alexe, S. Nagar, M. M. McCausland, S.  
579 Gupta, P. Tata, W. N. Haining, M. J. McElrath, D. Zhang, B. Hu, W. J. Greenleaf, J. J.  
580 Goronzy, M. J. Mulligan, M. Hellerstein, and R. Ahmed. 2017. Origin and differentiation  
581 of human memory CD8 T cells after vaccination. *Nature* 552: 362-367.
- 582 25. Komai-Koma, M., L. Jones, G. S. Ogg, D. Xu, and F. Y. Liew. 2004. TLR2 is expressed on  
583 activated T cells as a costimulatory receptor. *Proc Natl Acad Sci U S A* 101: 3029-3034.
- 584 26. Mercier, B. C., A. Cottalorda, C. A. Coupet, J. Marvel, and N. Bonnefoy-Berard. 2009.  
585 TLR2 engagement on CD8 T cells enables generation of functional memory cells in  
586 response to a suboptimal TCR signal. *J Immunol* 182: 1860-1867.
- 587 27. Salerno, F., A. Guislain, D. Cansever, and M. C. Wolkers. 2016. TLR-Mediated Innate  
588 Production of IFN-gamma by CD8+ T Cells Is Independent of Glycolysis. *J Immunol* 196:  
589 3695-3705.
- 590 28. Cottalorda, A., B. C. Mercier, F. M. Mbitikon-Kobo, C. Arpin, D. Y. Teoh, A. McMichael, J.  
591 Marvel, and N. Bonnefoy-Berard. 2009. TLR2 engagement on memory CD8(+) T cells  
592 improves their cytokine-mediated proliferation and IFN-gamma secretion in the absence  
593 of Ag. *Eur J Immunol* 39: 2673-2681.
- 594 29. Salerno, F., N. A. Paolini, R. Stark, M. von Lindern, and M. C. Wolkers. 2017. Distinct PKC-  
595 mediated posttranscriptional events set cytokine production kinetics in CD8(+) T cells.  
596 *Proc Natl Acad Sci U S A* 114: 9677-9682.
- 597 30. Lindstein, T., C. H. June, J. A. Ledbetter, G. Stella, and C. B. Thompson. 1989. Regulation  
598 of lymphokine messenger RNA stability by a surface-mediated T cell activation pathway.  
599 *Science* 244: 339-343.

- 600 31. Wang, J. G., M. Collinge, V. Ramgolam, O. Ayalon, X. C. Fan, R. Pardi, and J. R. Bender.  
601 2006. LFA-1-dependent HuR nuclear export and cytokine mRNA stabilization in T cell  
602 activation. *J Immunol* 176: 2105-2113.
- 603 32. de Witte, M. A., M. Coccoris, M. C. Wolkers, M. D. van den Boom, E. M. Mesman, J. Y.  
604 Song, M. van der Valk, J. B. Haanen, and T. N. Schumacher. 2006. Targeting self-antigens  
605 through allogeneic TCR gene transfer. *Blood* 108: 870-877.
- 606 33. Nicolet, B. P., A. Guislain, and M. C. Wolkers. 2017. Combined Single-Cell Measurement  
607 of Cytokine mRNA and Protein Identifies T Cells with Persistent Effector Function. *J*  
608 *Immunol* 198: 962-970.
- 609 34. Glasner, A., A. Levi, J. Enk, B. Isaacson, S. Viukov, S. Orlanski, A. Scope, T. Neuman, C. D.  
610 Enk, J. H. Hanna, V. Sexl, S. Jonjic, B. Seliger, L. Zitvogel, and O. Mandelboim. 2018.  
611 NKp46 Receptor-Mediated Interferon-gamma Production by Natural Killer Cells  
612 Increases Fibronectin 1 to Alter Tumor Architecture and Control Metastasis. *Immunity*  
613 48: 396-398.
- 614 35. Bowman, R. L., F. Klemm, L. Akkari, S. M. Pyonteck, L. Sevenich, D. F. Quail, S. Dhara, K.  
615 Simpson, E. E. Gardner, C. A. Iacobuzio-Donahue, C. W. Brennan, V. Tabar, P. H. Gutin,  
616 and J. A. Joyce. 2016. Macrophage Ontogeny Underlies Differences in Tumor-Specific  
617 Education in Brain Malignancies. *Cell Rep* 17: 2445-2459.
- 618 36. Patro, R., G. Duggal, M. I. Love, R. A. Irizarry, and C. Kingsford. 2017. Salmon provides  
619 fast and bias-aware quantification of transcript expression. *Nat Methods* 14: 417-419.
- 620 37. Betts, M. R., M. C. Nason, S. M. West, S. C. De Rosa, S. A. Migueles, J. Abraham, M. M.  
621 Lederman, J. M. Benito, P. A. Goepfert, M. Connors, M. Roederer, and R. A. Koup. 2006.  
622 HIV nonprogressors preferentially maintain highly functional HIV-specific CD8+ T cells.  
623 *Blood* 107: 4781-4789.
- 624 38. Precopio, M. L., M. R. Betts, J. Parrino, D. A. Price, E. Gostick, D. R. Ambrozak, T. E.  
625 Asher, D. C. Douek, A. Harari, G. Pantaleo, R. Bailer, B. S. Graham, M. Roederer, and R. A.  
626 Koup. 2007. Immunization with vaccinia virus induces polyfunctional and phenotypically  
627 distinctive CD8(+) T cell responses. *J Exp Med* 204: 1405-1416.
- 628 39. Lachmann, R., M. Bajwa, S. Vita, H. Smith, E. Cheek, A. Akbar, and F. Kern. 2012.  
629 Polyfunctional T cells accumulate in large human cytomegalovirus-specific T cell  
630 responses. *J Virol* 86: 1001-1009.
- 631 40. Farhat, K., S. Riekenberg, H. Heine, J. Debarry, R. Lang, J. Mages, U. Buwitt-Beckmann, K.  
632 Roschmann, G. Jung, K. H. Wiesmuller, and A. J. Ulmer. 2008. Heterodimerization of  
633 TLR2 with TLR1 or TLR6 expands the ligand spectrum but does not lead to differential  
634 signaling. *J Leukoc Biol* 83: 692-701.
- 635 41. Funderburg, N. T., J. K. Jadlowsky, M. M. Lederman, Z. Feng, A. Weinberg, and S. F. Sieg.  
636 2011. The Toll-like receptor 1/2 agonists Pam(3) CSK(4) and human beta-defensin-3  
637 differentially induce interleukin-10 and nuclear factor-kappaB signalling patterns in  
638 human monocytes. *Immunology* 134: 151-160.
- 639 42. Dillon, S., S. Agrawal, K. Banerjee, J. Letterio, T. L. Denning, K. Oswald-Richter, D. J.  
640 Kasprovicz, K. Kellar, J. Pare, T. van Dyke, S. Ziegler, D. Unutmaz, and B. Pulendran.  
641 2006. Yeast zymosan, a stimulus for TLR2 and dectin-1, induces regulatory antigen-  
642 presenting cells and immunological tolerance. *J Clin Invest* 116: 916-928.
- 643 43. Anderson, P. 2010. Post-transcriptional regulons coordinate the initiation and resolution  
644 of inflammation. *Nat Rev Immunol* 10: 24-35.
- 645 44. Kafasla, P., A. Skliris, and D. L. Kontoyiannis. 2014. Post-transcriptional coordination of  
646 immunological responses by RNA-binding proteins. *Nat Immunol* 15: 492-502.



- 647 45. Vlasova-St Louis, I., and P. R. Bohjanen. 2014. Post-transcriptional regulation of cytokine  
648 signaling by AU-rich and GU-rich elements. *J Interferon Cytokine Res* 34: 233-241.
- 649 46. Salerno, F., and M. C. Wolkers. 2015. T-cells require post-transcriptional regulation for  
650 accurate immune responses. *Biochem Soc Trans* 43: 1201-1207.
- 651 47. Salerno, F., S. Engels, M. van den Biggelaar, F. P. J. van Alphen, A. Guislain, W. Zhao, D. L.  
652 Hodge, S. E. Bell, J. P. Medema, M. von Lindern, M. Turner, H. A. Young, and M. C.  
653 Wolkers. 2018. Translational repression of pre-formed cytokine-encoding mRNA  
654 prevents chronic activation of memory T cells. *Nat Immunol* 19: 828-837.
- 655 48. Freen-van Heeren, J. J., B. P. Nicolet, and M. C. Wolkers. 2018. Measuring T Cell  
656 Responses by Flow Cytometry–Based Fluorescence *In Situ* Hybridization. *Crit Rev*  
657 *Immunol* 38: 131-143.
- 658 49. Dunne, A., L. A. Mielke, A. C. Allen, C. E. Sutton, R. Higgs, C. C. Cunningham, S. C. Higgins,  
659 and K. H. Mills. 2015. A novel TLR2 agonist from Bordetella pertussis is a potent adjuvant  
660 that promotes protective immunity with an acellular pertussis vaccine. *Mucosal*  
661 *Immunol* 8: 607-617.
- 662 50. Seya, T., H. Shime, Y. Takeda, M. Tatematsu, K. Takashima, and M. Matsumoto. 2015.  
663 Adjuvant for vaccine immunotherapy of cancer--focusing on Toll-like receptor 2 and 3  
664 agonists for safely enhancing antitumor immunity. *Cancer Sci* 106: 1659-1668.
- 665 51. Goff, P. H., T. Hayashi, L. Martinez-Gil, M. Corr, B. Crain, S. Yao, H. B. Cottam, M. Chan, I.  
666 Ramos, D. Eggink, M. Heshmati, F. Krammer, K. Messer, M. Pu, A. Fernandez-Sesma, P.  
667 Palese, and D. A. Carson. 2015. Synthetic Toll-like receptor 4 (TLR4) and TLR7 ligands as  
668 influenza virus vaccine adjuvants induce rapid, sustained, and broadly protective  
669 responses. *J Virol* 89: 3221-3235.
- 670 52. Bagnoli, F., M. R. Fontana, E. Soldaini, R. P. Mishra, L. Fiaschi, E. Cartocci, V. Nardi-Dei, P.  
671 Ruggiero, S. Nosari, M. G. De Falco, G. Lofano, S. Marchi, B. Galletti, P. Mariotti, M.  
672 Bacconi, A. Torre, S. Maccari, M. Scarselli, C. D. Rinaudo, N. Inoshima, S. Savino, E. Mori,  
673 S. Rossi-Paccani, B. Baudner, M. Pallaoro, E. Swennen, R. Petracca, C. Brettoni, S.  
674 Liberatori, N. Norais, E. Monaci, J. Bubeck Wardenburg, O. Schneewind, D. T. O'Hagan,  
675 N. M. Valiante, G. Bensi, S. Bertholet, E. De Gregorio, R. Rappuoli, and G. Grandi. 2015.  
676 Vaccine composition formulated with a novel TLR7-dependent adjuvant induces high  
677 and broad protection against Staphylococcus aureus. *Proc Natl Acad Sci U S A* 112: 3680-  
678 3685.
- 679 53. Dowling, J. K., and A. Mansell. 2016. Toll-like receptors: the swiss army knife of  
680 immunity and vaccine development. *Clin Transl Immunology* 5: e85.
- 681 54. Yin, P., X. Liu, A. S. Mansfield, S. M. Harrington, Y. Li, Y. Yan, and H. Dong. 2016. CpG-  
682 induced antitumor immunity requires IL-12 in expansion of effector cells and down-  
683 regulation of PD-1. *Oncotarget* 7: 70223-70231.
- 684 55. Sato-Kaneko, F., S. Yao, A. Ahmadi, S. S. Zhang, T. Hosoya, M. M. Kaneda, J. A. Varner, M.  
685 Pu, K. S. Messer, C. Guiducci, R. L. Coffman, K. Kitaura, T. Matsutani, R. Suzuki, D. A.  
686 Carson, T. Hayashi, and E. E. Cohen. 2017. Combination immunotherapy with TLR  
687 agonists and checkpoint inhibitors suppresses head and neck cancer. *JCI Insight* 2.
- 688 56. Sagiv-Barfi, I., D. K. Czerwinski, S. Levy, I. S. Alam, A. T. Mayer, S. S. Gambhir, and R. Levy.  
689 2018. Eradication of spontaneous malignancy by local immunotherapy. *Sci Transl Med*  
690 10.
- 691 57. Wimmers, F., E. H. Aarntzen, T. Duiveman-deBoer, C. G. Figdor, J. F. Jacobs, J. Tel, and I.  
692 J. de Vries. 2016. Long-lasting multifunctional CD8(+) T cell responses in end-stage

- 693 melanoma patients can be induced by dendritic cell vaccination. *Oncoimmunology* 5:  
694 e1067745.
- 695 58. Geng, D., L. Zheng, R. Srivastava, N. Asproditis, C. Velasco-Gonzalez, and E. Davila. 2010.  
696 When Toll-like receptor and T-cell receptor signals collide: a mechanism for enhanced  
697 CD8 T-cell effector function. *Blood* 116: 3494-3504.
- 698 59. Akira, S., S. Uematsu, and O. Takeuchi. 2006. Pathogen recognition and innate  
699 immunity. *Cell* 124: 783-801.
- 700 60. Kawai, T., and S. Akira. 2010. The role of pattern-recognition receptors in innate  
701 immunity: update on Toll-like receptors. *Nat Immunol* 11: 373-384.
- 702 61. O'Neill, L. A., D. Golenbock, and A. G. Bowie. 2013. The history of Toll-like receptors -  
703 redefining innate immunity. *Nat Rev Immunol* 13: 453-460.
- 704 62. Kawai, T., and S. Akira. 2007. TLR signaling. *Semin Immunol* 19: 24-32.
- 705 63. Sica, A., L. Dorman, V. Viggiano, M. Cippitelli, P. Ghosh, N. Rice, and H. A. Young. 1997.  
706 Interaction of NF-kappaB and NFAT with the interferon-gamma promoter. *J Biol Chem*  
707 272: 30412-30420.
- 708 64. Banerjee, D., H. C. Liou, and R. Sen. 2005. c-Rel-dependent priming of naive T cells by  
709 inflammatory cytokines. *Immunity* 23: 445-458.
- 710 65. Robinson, D., K. Shibuya, A. Mui, F. Zonin, E. Murphy, T. Sana, S. B. Hartley, S. Menon, R.  
711 Kastelein, F. Bazan, and A. O'Garra. 1997. IGIF does not drive Th1 development but  
712 synergizes with IL-12 for interferon-gamma production and activates IRAK and  
713 NFkappaB. *Immunity* 7: 571-581.
- 714 66. Barbulescu, K., C. Becker, J. F. Schlaak, E. Schmitt, K. H. Meyer zum Buschenfelde, and  
715 M. F. Neurath. 1998. IL-12 and IL-18 differentially regulate the transcriptional activity of  
716 the human IFN-gamma promoter in primary CD4+ T lymphocytes. *J Immunol* 160: 3642-  
717 3647.
- 718 67. Nakahira, M., H. J. Ahn, W. R. Park, P. Gao, M. Tomura, C. S. Park, T. Hamaoka, T. Ohta,  
719 M. Kurimoto, and H. Fujiwara. 2002. Synergy of IL-12 and IL-18 for IFN-gamma gene  
720 expression: IL-12-induced STAT4 contributes to IFN-gamma promoter activation by up-  
721 regulating the binding activity of IL-18-induced activator protein 1. *J Immunol* 168: 1146-  
722 1153.
- 723 68. Dean, J. L., G. Sully, A. R. Clark, and J. Saklatvala. 2004. The involvement of AU-rich  
724 element-binding proteins in p38 mitogen-activated protein kinase pathway-mediated  
725 mRNA stabilisation. *Cell Signal* 16: 1113-1121.
- 726 69. Tiedje, C., H. Holtmann, and M. Gaestel. 2014. The role of mammalian MAPK signaling in  
727 regulation of cytokine mRNA stability and translation. *J Interferon Cytokine Res* 34: 220-  
728 232.
- 729 70. Salerno, F., A. Guislain, J. Freen-van Heeren, B. P. Nicolet, H. A. Young, and M. C.  
730 Wolkers. 2018. Critical role of post-transcriptional regulation for IFN- $\gamma$  in tumor-  
731 infiltrating T cells. *Oncoimmunology*, DOI: 10.1080/2162402X.2018.1532762
- 732 71. Rubtsova, K., A. V. Rubtsov, K. Halemano, S. X. Li, J. W. Kappler, M. L. Santiago, and P.  
733 Marrack. 2016. T Cell Production of IFN $\gamma$  in Response to TLR7/IL-12 Stimulates  
734 Optimal B Cell Responses to Viruses. *PLoS One* 11: e0166322.

735

736 **FIGURE LEGENDS**

737 **Figure 1: TLR2 acts as a costimulatory molecule and enhances cytokine production**

738 **of murine and human CD8<sup>+</sup> T cells**

739 (A) CD8<sup>+</sup> T cells purified from C57BL/6J mice were *ex vivo* stimulated with 2µg/ml  
740 αCD3, with or without 5µg/ml TLR2 ligand Pam<sub>3</sub>CysSK<sub>4</sub> (Pam3), 1µg/ml αCD28, or a  
741 combination thereof. Dot plots represent IFN-γ and TNF-α production measured by  
742 intracellular cytokine staining. For pooled data see Suppl Fig 1B. (B-C) *In vitro* activated  
743 CD8<sup>+</sup> OT-I T cells were cultured in rmIL-7 for 3-15 days. T cells were then reactivated  
744 with 100nM SIINFEKL (N4) or SIITFEKL (T4) OVA<sub>257-264</sub> peptide (B), or with 0.1nM  
745 (low) or 1nM (int) SIINFEKL OVA<sub>257-264</sub> peptide (C). When indicated, 5µg/ml Pam3 was  
746 added to the cell culture. (B) Compiled data (n=6 mice±SD) of percentage of cytokine  
747 producing T cells from two independently performed experiments [Paired Student *t*-test;  
748 \*p<0.05; \*\*p<0.01; \*\*\*\*p<0.0001]. (C) Representative dot plots of 8 mice and 4  
749 independently performed experiments. (D) Left: dot plots represent IFN-γ and TNF-α  
750 production of human CD8<sup>+</sup> T cells that were stimulated with 1µg/ml αCD3, with or  
751 without 0.1µg/ml TLR2 ligand Pam3 or 1µg/ml αCD28. Right: compiled data (n=6  
752 donors±SD) of percentage of IFN-γ producing T cells from two independently performed  
753 experiments [RM-ANOVA with Dunnett's multiple comparissons collection; \*p<0.05].  
754 (A-E) T cells were cultured for 6h in the presence of Brefeldin A. T cells cultured in the  
755 absence of stimuli were used as negative control.

756

757 **Figure 2: Simultaneous detection of cytokine mRNA and protein by Flow-FISH of**  
758 **murine T cells**

759 (A) CD8<sup>+</sup> OT-I T cells (rested for 5-7 days) were stimulated for 4h with 100nM OVA  
760 peptide, and cytokine mRNA and protein expression was analyzed by flow cytometry. T  
761 cells were stained with FISH probes specific for *Ifng*, *Tnfa* and *Il2* mRNA (upper panel),  
762 or with an unrelated FISH probe set against human *PHOX2B* (lower panel). Dot plots are  
763 representative of at least 2 independently performed experiments. (B-C) *Ifng*, *Tnfa* and  
764 *Il2* mRNA expression and IFN- $\gamma$ , TNF- $\alpha$  and IL-2 protein production of untreated T cells  
765 or T cells stimulated with 1nM (OVA<sub>int</sub>) or 100nM (OVA<sub>hi</sub>) OVA peptide for indicated  
766 time points. (B) Dot plots represent cytokine production at 4h of activation. (C) Graphs  
767 (mean $\pm$ SD) show percentage of total mRNA<sup>+</sup> and total protein<sup>+</sup> T cells during the entire  
768 time course. Data are representative (B) or pooled (C) from 3 independently performed  
769 experiments.

770

771 **Figure 3: TLR2-mediated costimulation augments *Ifng* mRNA expression levels**

772 (A) *In vitro* activated OT-I T cells (rested for 5-7 days) were stimulated with OVA<sub>int</sub>,  
773 OVA<sub>int</sub> plus Pam3 or OVA<sub>hi</sub> for indicated time points. 1 $\mu$ g/ml brefeldin A was added  
774 during the last 2h of activation and intracellular cytokine staining was performed to  
775 analyze protein production kinetics. Graphs indicate the total percentage of IFN- $\gamma$ <sup>+</sup>, TNF-  
776  $\alpha$ <sup>+</sup> and IL-2<sup>+</sup> T cells (mean $\pm$ SD) pooled from 3 mice and 3 independently performed  
777 experiments. (B-C) *Ifng* mRNA expression and IFN- $\gamma$  protein production was determined  
778 by Flow-FISH upon 2, 4, or 6h T cell activation as described above. Unstimulated T cells  
779 were used as negative control. (C) Graph indicates the total percentage of *Ifng* mRNA<sup>+</sup> T

780 cells (top) and fold increase of *Ifng* mRNA MFI upon activation with indicated stimuli  
781 compared to unstimulated T cells (time 0; bottom). Data are presented as mean $\pm$ SD of 3-  
782 5 mice and 2-4 independently performed experiments.

783

784 **Figure 4: TLR2 triggering enhances TCR-dependent *Ifng* mRNA stability**

785 **(A-B)** *In vitro* activated OT-I T cells (rested for 5-7 days) were stimulated for 3h with  
786 OVA<sub>low</sub>, OVA<sub>int</sub> or OVA<sub>hi</sub> (A), or with OVA<sub>low</sub> or OVA<sub>int</sub> in combination with Pam3 (B),  
787 and then incubated with 10 $\mu$ g/ml Actinomycin D (ActD). T cells were harvested at the  
788 indicated time points to determine *Ifng* mRNA stability by RT-PCR. Data are presented  
789 as mean $\pm$ SD of 6-8 mice and 4 independently performed experiments [one-way ANOVA  
790 with Dunnett's multiple comparison; \*p<0.05; \*\*p<0.01; \*\*\*p<0.001]. **(C)** Intracellular  
791 IFN- $\gamma$  staining of OT-I T cells stimulated for 6h with 5 $\mu$ g/ml Pam3, 1ng/ml rIL-12, or a  
792 combination thereof. Unstimulated T cells were used as negative control. For pooled data  
793 see panel D. **(D)** T cells were stimulated with OVA<sub>low</sub>, OVA<sub>int</sub> or IL-12, with or without  
794 the addition of Pam3. Left: graph depicts the percentage of IFN- $\gamma$  producing T cells after  
795 6h stimulation. Right: *Ifng* mRNA expression was measured by RT-PCR upon 2h T cell  
796 stimulation. Data were pooled from 3 independently performed experiments (n=4-5 mice;  
797 mean $\pm$ SD) [Unpaired Student *t*-test; \*\*p<0.005; \*\*\*p<0.0005; \*\*\*\*p<0.0001]. **(E)** *Ifng*  
798 mRNA stability of T cells stimulated for 3h as indicated. Data pooled from 4 mice and  
799 two independently performed experiments (mean $\pm$ SD) [one-way ANOVA with Dunnett's  
800 multiple comparison; ns= non-significant].

801

802 **Figure 5: The engagement of TLR7 promotes IFN- $\gamma$  production of T cells without**  
803 **enhancing *Ifng* mRNA stability**

804 *In vitro* activated OT-I T cells (rested for 5-7 days) were stimulated with OVA<sub>low</sub>, OVA<sub>int</sub>  
805 or IL-12, with or without the addition of 10 $\mu$ g/ml R848. Unstimulated T cells were used  
806 as negative control. (A) Intracellular IFN- $\gamma$  staining of T cells stimulated for 6h. For  
807 pooled data see panel B. (B) Top: IFN- $\gamma$  protein production. Bottom: *Ifng* mRNA  
808 expression of T cells stimulated for 2h, and measured by RT-PCR. Data were pooled  
809 from 3 independently performed experiments (n=4-5 mice; mean $\pm$ SD) [Unpaired Student  
810 *t*-test; \*p<0.05; \*\*p<0.005; \*\*\*p<0.0005]. (C) *Ifng* mRNA stability was determine upon  
811 3h T cell activation, and addition of ActD for indicated time points. Data were pooled  
812 from 4 independently performed experiments (n=6-8 mice; mean $\pm$ SD). (D) IFN- $\gamma$  protein  
813 production after 6h T cell stimulation with indicated stimuli. Graphs show data  
814 (mean $\pm$ SD) pooled from 6 mice and 3 independently performed experiments [one-way  
815 ANOVA with Tukey's multiple comparison; \*p<0.05; \*\*p<0.01].

816

817 **Figure 6: TLR-triggering promotes polyfunctional T cell responses to tumor cells**

818 (A) *In vitro* activated OT-I T cells (rested for 5-7 days) were co-cultured at a 6:1  
819 effector:target ratio with B16F10 melanoma cells loaded with indicated amounts of  
820 OVA<sub>257-264</sub> peptide for 6h. When specified, 5 $\mu$ g/ml Pam3 or 10 $\mu$ g/ml R848 were added to  
821 the culture system. Graphs represent IFN- $\gamma$ , TNF- $\alpha$  and IL-2 production of OT-I T cells  
822 measured by intracellular cytokine staining. Data is representative of 3 independently  
823 performed experiments (n=6 mice; mean  $\pm$  SD) [two-way ANOVA with Dunnett's  
824 multiple comparison; \*p<0.05; \*\*p<0.01]. For representative dot plots, see Suppl Fig 4B.

825 **(B-C)** OT-I T cells were co-cultured with B16 melanoma cells constitutively expressing  
826 the C-terminal part of ovalbumin (B16-OVA), as described above. Increasing amounts of  
827 Pam3 or R848 were added as indicated. (B) Dot plots represent IFN- $\gamma$  and TNF- $\alpha$   
828 production measured by intracellular cytokine staining at 5h of activation. (C) Graphs  
829 depict the cytokine profile analysis of T cells activated as in B. Data are representative  
830 (B) or pooled (C) from 6 mice and three independently performed experiments (mean  $\pm$   
831 SD).

832 **SUPPLEMENTARY FIGURE LEGENDS**

833 **Supplementary Figure 1: Cytokine production of activated CD8<sup>+</sup> T cells**

834 (A) Dot plots represent CD8 $\alpha\beta$ <sup>+</sup> T cells (left) and CD8 $\beta$ <sup>-</sup>CD11b<sup>+</sup> and CD8 $\beta$ <sup>-</sup>CD11c<sup>+</sup>  
835 myeloid cells (right) before selection, after MACS-selection, or after FACS-sorting. (B-  
836 D) MACS-selected (B) or FACS-sorted (C-D) murine CD8 $\alpha\beta$ <sup>+</sup> T cells were stimulated  
837 for 6h with Pam3 (B-C), or R848 (D), in combination with anti-CD3 alone or  
838  $\alpha$ CD3/ $\alpha$ CD28. IFN- $\gamma$ , TNF- $\alpha$  and IL-2 production was measured by intracellular  
839 cytokine staining. Graphs depict the percentage (mean $\pm$ SD) of cytokine producing  
840 CD44<sup>hi</sup>CD8 $\alpha\beta$ <sup>+</sup> T cells (left) or CD44<sup>low</sup>CD8 $\alpha\beta$ <sup>+</sup> T cells (right) (n=2-3 mice) (E)  
841 Purified human CD8<sup>+</sup> T cells were stimulated for 6h with  $\alpha$ CD3 alone, or in combination  
842 with  $\alpha$ CD28, Pam3 (left), or R848 (right). Graphs depict the percentage (mean $\pm$ SD) of  
843 cytokine producing CD8<sup>+</sup> T cells. Data  $\pm$  SD are pooled from 6 donors and two  
844 independently performed experiments.

845

846 **Supplementary Figure 2: TLR1/2-, and not TLR1/6-mediated costimulation**  
847 **enhances T cell cytokine production.**

848 (A-B) *In vitro* activated OT-I T-cells (rested for 3 days) and BM-derived macrophages  
849 (BMM) were activated for 4 hours with indicated stimuli in the presence of brefeldin A.  
850 (A) Representative dot plots of IFN- $\gamma$ , TNF- $\alpha$  and IL-2 production of OT-I T-cells (top)  
851 and of TNF- $\alpha$  production of BMM (bottom). (B) Graphs show the percentage of cytokine  
852 producing OT-I T-cells pooled from 3 mice (mean $\pm$ SD).

853



854 **Supplementary Figure 3: Validation of Flow-FISH analysis of murine CD8<sup>+</sup> T cells**

855 (A) *In vitro* activated OT-I T cells (rested for 5-7 days) cells were stimulated for 4h with  
856 100nM OVA peptide, and cytokine mRNA and protein expression was measured by  
857 Flow-FISH. The specificity of *Ifng*, *Tnfa*, and *Il2* FISH probe signal was determined by  
858 adding increasing amounts of competing unlabeled probes during the staining procedure.  
859 (B) Histograms represent mRNA (left) and protein (right) levels of IFN- $\gamma$ , TNF- $\alpha$  and IL-  
860 2 production upon stimulation of T cells with OVA<sub>int</sub> (top) or OVA<sub>hi</sub> (bottom) for  
861 indicated time points. Graphs are representative for 3 independently performed  
862 experiments.

863

864 **Supplementary Figure 4: Cytokine production of OT-I T cells upon co-culture with**  
865 **B16 melanoma cells and the effect of TLR-ligands on B16-OVA cells.**

866 (A) Transcripts per million (TPM) of TLR1, TLR2, TLR6 and TLR7 expression of B16-  
867 F10 cells left untreated or treated with IFN- $\gamma$ , and of blood-derived monocytes. RNA-seq  
868 data were retrieved from the Sequence Repository Archive (SRA,  
869 <https://www.ncbi.nlm.nih.gov/sra>) (ref: GSE106390, (34) and samples: SRR5483450,  
870 SRR5483451, SRR5483452 from GSE86573, (35), respectively). (B) Representative dot  
871 plots of IFN- $\gamma$  and TNF- $\alpha$  production of previously *in vitro* activated OT-I T cells (rested  
872 for 5-7 days) that were co-cultured for 5h with B16-F10 melanoma cells loaded with  
873 0.1nM (low), 1nM (int) or 100nM (hi) OVA<sub>257-264</sub> peptide, with or without 5 $\mu$ g/ml Pam3  
874 or 10  $\mu$ g/ml R848. (C) Graph depicts the percentage (mean $\pm$ SD) of CD107a<sup>+</sup> OT-I T  
875 cells that were co-culture for 5h with B16-OVA cells with or without the presence of  
876 increasing amounts of Pam3 or R848 (n=4-8 mice). (D) Graph indicates the percentage of

877 live B16-OVA cells, defined as Near-IR<sup>-</sup> CD4<sup>+</sup>, that were cultured for 5h in the only  
878 presence of Pam3 or R848. Data were pooled from 3 independently performed  
879 experiments (mean±SD). (E) PD-L1 expression was measured on B16-OVA cells that  
880 were cultured alone (shaded black histograms) or co-cultured with OT-I T cells (shaded  
881 red histograms), in the presence of indicated amounts of Pam3 or R848. Numbers  
882 indicate PD-L1 Geo-MFI. Data are representative of two independently performed  
883 experiments.

# Salerno, Freen-van Heeren *et al.* Figure 1

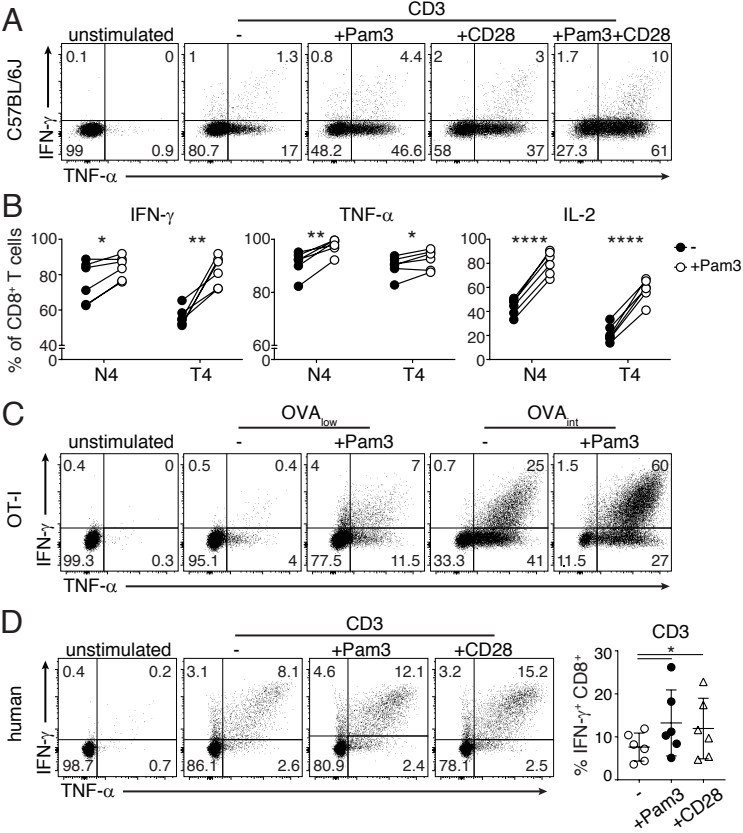

# Salerno, Freen-van Heeren *et al.* Figure 2

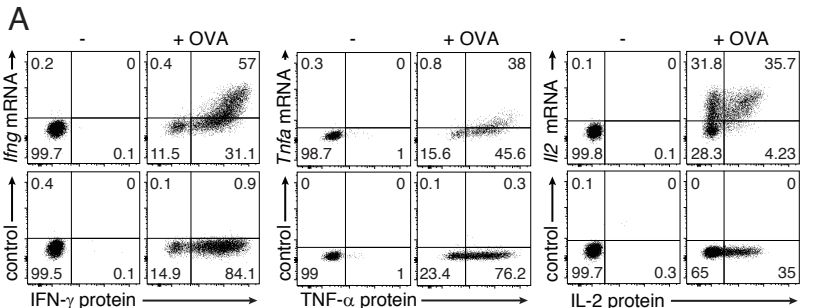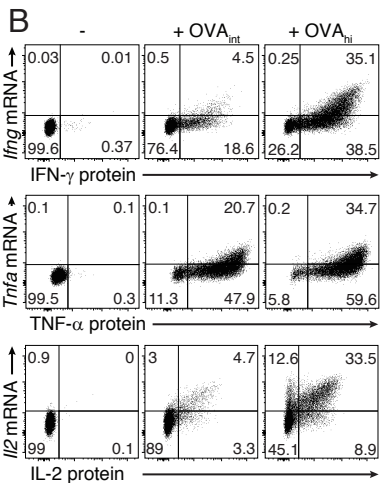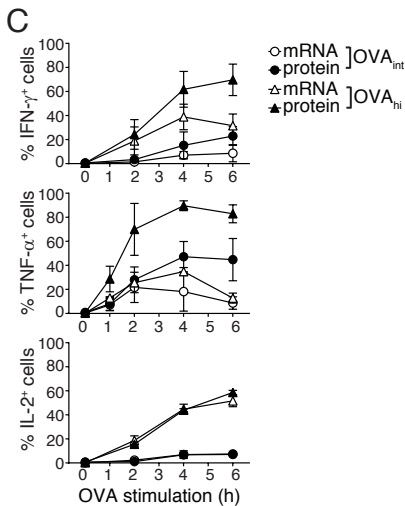

# Salerno, Freen-van Heeren *et al.* Figure 3

## A

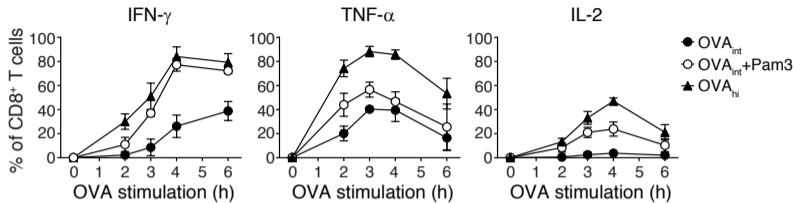

## B

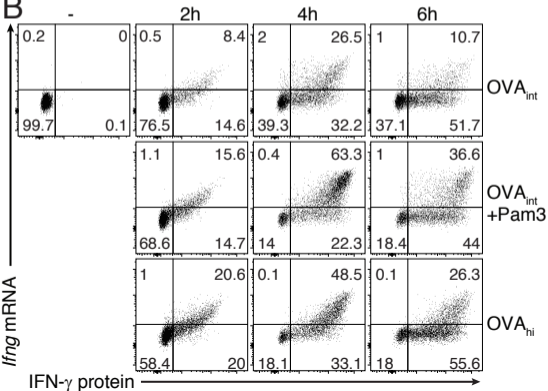

## C

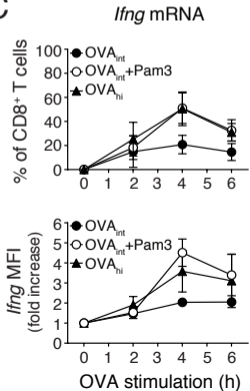

# Salerno, Freen-van Heeren *et al.* Figure 4

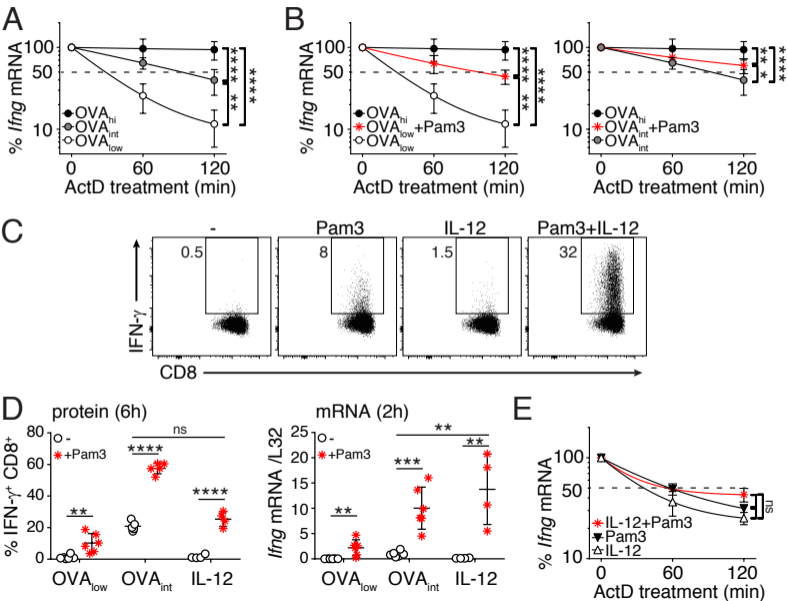

# Salerno, Freen-van Heeren *et al.* Figure 5

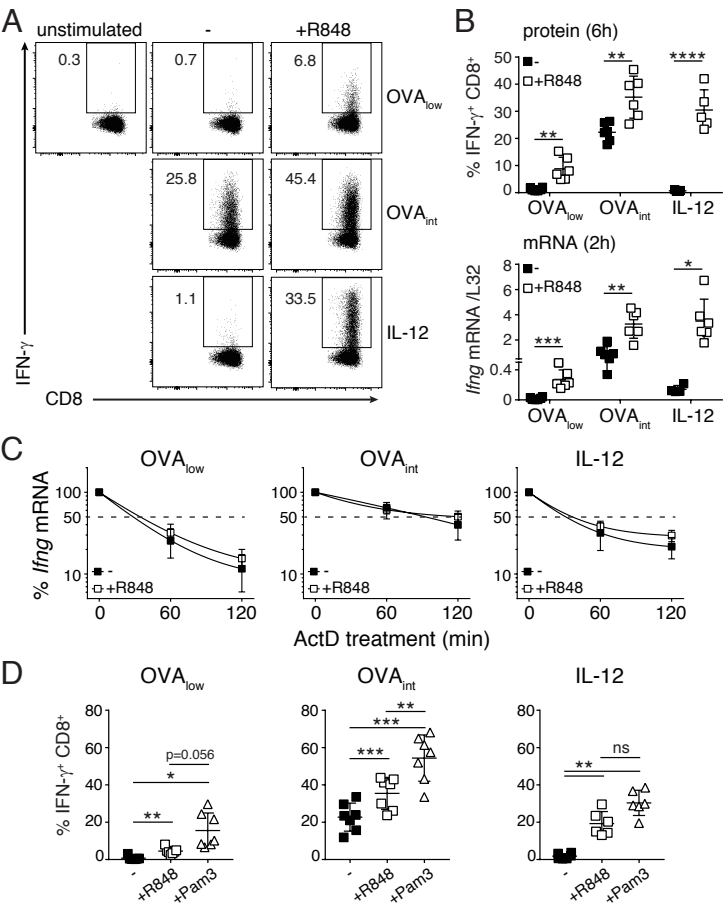

# Salerno, Freen-van Heeren *et al.* Figure 6

**A**
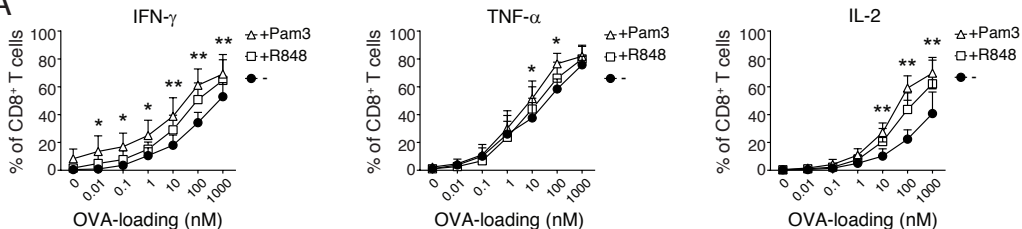
**B**
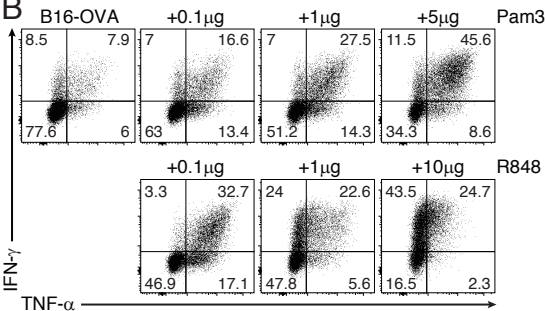
**C**
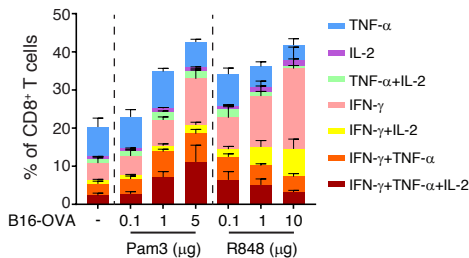

Source: https://www.biorxiv.org/content/10.1101/375840v2.full.pdf
